# Supplementary material for: Dose-dependent expression of claudin-5 is a modifying factor in schizophrenia
Source: PubMed Central journal article supplement (PMC6298981; doi:10.1038/mp.2017.156), 2017-10-10

| <b>Geographical Region</b>                       | <b>Geographical Sub-Regions</b> | <b>Primary Language Family</b>                                            |
|--------------------------------------------------|---------------------------------|---------------------------------------------------------------------------|
| <b>Arctic/Siberia/Central Asia</b>               | Eastern Siberia and Greenland   | Turkic<br>Chukchi–Kamchatkan<br><br>Eskimo–Aleut<br><br>Nivkh<br>Tungusic |
|                                                  | South-Central Siberia           | Mongolic<br>Turkic                                                        |
|                                                  | Central Asia                    | Indo-European<br>Turkic                                                   |
|                                                  | Central/Western Siberia         | Uralic<br>Uralic<br>Yeniseian                                             |
|                                                  |                                 |                                                                           |
| <b>Southeast and East Asia</b>                   | East Asia                       | Japonic<br>Koreanic<br>Tungusic<br>Sino-Tibetan<br>Hmong-Mien<br>Mongolic |
|                                                  | Mainland Southeast Asia         | Tai-Kadai<br>Austroasiatic<br>Sino-Tibetan                                |
| <b>Americas</b>                                  | Andes and Gran Chaco            | Arawak<br>Matacoan<br>Quechuan                                            |
|                                                  | Mesoamerica                     | Mayan<br>Mixe–Zoque<br>Oto-Manguean                                       |
|                                                  | North America                   | Athabaskan<br>Uto-Aztecan                                                 |
|                                                  | Amazon                          | Tupian<br>Arawak                                                          |
| <b>Australasia/Oceania/Island Southeast Asia</b> | Australia                       | Australian Languages *                                                    |
|                                                  | Island Southeast Asia           | Austronesian                                                              |
|                                                  | Papua New Guinea                | Papuan Languages *<br>Bougainville Languages *                            |
|                                                  | Polynesia                       | Austronesian                                                              |
| <b>South Asia</b>                                | Nepal                           | Indo-European<br>Kusunda                                                  |

Sheet1

|                                               |                      |                                                                       |
|-----------------------------------------------|----------------------|-----------------------------------------------------------------------|
|                                               | Pakistan             | Indo-European<br>Dravidian<br>Burushaski<br>-                         |
|                                               | India and Bangladesh | Dravidian<br>Indo-European<br>Austroasiatic                           |
| <b>Africa</b>                                 | Central Africa       | -                                                                     |
|                                               | East Africa          | Afro-Asiatic<br>Nilo-Saharan<br>Niger-Congo                           |
|                                               | North Africa         | Afro-Asiatic                                                          |
|                                               | West Africa          | Niger-Congo<br>Niger-Congo<br>-                                       |
|                                               | South Africa         | Niger-Congo<br>Khoe/Kx'a                                              |
| <b>Europe</b>                                 | Volga/Ural           | Uralic<br><br>Turkic                                                  |
|                                               | Northeast Europe     | Uralic<br>Indo-European                                               |
|                                               | Eastern Europe       | Indo-European                                                         |
|                                               | Southern Europe      | Uralic<br>Indo-European                                               |
|                                               | Western Europe       | Indo-European<br>Basque                                               |
|                                               | <b>Western Asia</b>  | South Caucasus and Turkey                                             |
| Iran                                          |                      | Indo-European                                                         |
| North Caucasus                                |                      | Northwest Caucasian<br>Turkic<br>Northeast Caucasian<br>Indo-European |
| Arabian Peninsula, the Levant and Mesopotamia |                      | Afro-Asiatic<br>Afro-Asiatic                                          |

|  |              |
|--|--------------|
|  | Afro-Asiatic |
|--|--------------|

Sheet1

| Language Grouping(s)            | Population                           | Population No. Individuals |
|---------------------------------|--------------------------------------|----------------------------|
| North Siberian                  | Yakut                                | 12                         |
| Chuckchi                        | Chuckchi                             | 6                          |
| Koryak                          | Koryak                               | 16                         |
| Itelmen                         | Itelmen                              | 1                          |
| Yukip-Inuit                     | Eskimo/Greenland Inuit               | 11                         |
| Aleut                           | Aleut                                | 2                          |
| -                               | Nivkh                                | 2                          |
| Northern Tungusic               | Even/Evenk/Oroqen                    | 26                         |
| Southern Tungusic               | Ulchi/Hezhen                         | 4                          |
| -                               | Buryat                               | 17                         |
| South Siberian                  | Altaiian/Shor/Tubalar/Telengit/Tuvan | 17                         |
| Iranian                         | Tajik/Shugnan/Rushan-Vanch/Yaghnobi  | 9                          |
| Northwestern                    | Kazakh/Kyrgyz                        | 12                         |
| Southeastern                    | Uygur/Uzbek                          | 6                          |
| Southwestern                    | Turkmen                              | 3                          |
| Samoyedic                       | Nganasan/Selkup/Nenets               | 11                         |
| Mansi/Khanty                    | Mansis/Khanty                        | 8                          |
| Ket                             | Ket                                  | 3                          |
| Japanese                        | Japanese                             | 3                          |
| Korean                          | Korean                               | 2                          |
| Southern Tungusic               | Xibo                                 | 2                          |
| Chinese/Tujia                   | Han/Tujia                            | 6                          |
| Hmongic                         | She/Miao                             | 4                          |
| -                               | Mongolian/Daur/Tu                    | 11                         |
| Tai                             | Thai/Dai                             | 7                          |
| Khmer/Vietic                    | Cambodian/Vietnamese                 | 14                         |
| Lolo-Burmese/Qiangic            | Burmese/Yi/Naxi                      | 15                         |
| Tibetic                         | Lahu                                 | 2                          |
| Bolivia-Parana                  | Chané                                | 1                          |
| -                               | Wichi                                | 4                          |
| -                               | Cachi/Quecha/Kolla                   | 12                         |
| -                               | Mayan                                | 2                          |
| -                               | Mixe                                 | 3                          |
| -                               | Mixtec/Zapotec                       | 4                          |
| -                               | Athabaskan                           | 2                          |
| -                               | Pima                                 | 2                          |
| -                               | Karitiana/Surui                      | 6                          |
| Upper Amazon                    | Piapoco                              | 2                          |
|                                 | Australian                           | 2                          |
| Malayo-Polynesian (Phillippine) | Batak/Vizayan/Igorot/Luzon           | 17                         |
| Adopted Malayo-Polynesian       | Aeta/Agta                            | 6                          |
| Malayo-Polynesian (Bornean)     | Bajo/Dusun/Lebbo/Murut               | 26                         |
| Formosan                        | Ami/Atayal                           | 3                          |
|                                 | Papuan                               | 22                         |
|                                 | Bougainville                         | 2                          |
| Polynesian                      | Maori/Hawaiian                       | 2                          |
| Indo-Aryan                      | Tamang/Brahmin                       | 2                          |
| -                               | Kusunda                              | 2                          |

Sheet1

|                                |                                                                                                            |    |
|--------------------------------|------------------------------------------------------------------------------------------------------------|----|
| Indo-Aryan                     | Sindhi/Punjabi/Kalash                                                                                      | 8  |
| Iranian                        | Pathan/Balochi/Hazara                                                                                      | 6  |
| Northern                       | Brahui                                                                                                     | 2  |
| -                              | Burusho                                                                                                    | 2  |
| -                              | Makrani                                                                                                    | 2  |
| Southern/South-Central         | Baliya/Gond/Kapu/Madiga/Mala/Irula/Malayan/Konda Dora                                                      | 17 |
| Indo-Aryan                     | Brahmin/Gupta/Kshatriya/Kol/Kurmi/Punjab/Thakur/Bengali/Orissa/Reli/Dhaka-mixed-pop/Madhya-Pradesh/Marwadi | 20 |
| Munda                          | Asur/Ho/Santhal                                                                                            | 3  |
| -                              | Central African Pygmies                                                                                    | 9  |
| Cushtic                        | Somali                                                                                                     | 1  |
| Nilotic                        | Dinka/Luo/Masai                                                                                            | 8  |
| Northeast Bantu                | BantuKenya/Luhya                                                                                           | 4  |
| Berber/Arab                    | Mozabite/Saharawi                                                                                          | 4  |
| Volta-Niger                    | Esan/Yoruba                                                                                                | 6  |
| Mande                          | Mandenka/Mende                                                                                             | 6  |
| -                              | Gambian                                                                                                    | 2  |
| Southwest Bantu/Southern Bantu | BantuBotswana/Namibia                                                                                      | 4  |
| -                              | Ju hoan North/Khomani San                                                                                  | 7  |
| Permic                         | Komis/Udmurd                                                                                               | 6  |
| Mari                           | Mari                                                                                                       | 4  |
| Mordvinic                      | Mordvins                                                                                                   | 3  |
| Northwestern                   | Tatar/Bashkir                                                                                              | 12 |
| Southwestern                   | Chuvash                                                                                                    | 3  |
| Finnic                         | Estonian/Finnish/Karelian/Vepsian/Ingrian                                                                  | 24 |
| Sami                           | Sami                                                                                                       | 5  |
| Baltic                         | Lithuanian/Latvian                                                                                         | 6  |
| West Slavic                    | Pole/Czech                                                                                                 | 6  |
| East Slavic                    | Cossack/Russian/Ukrainian/Belarusian                                                                       | 24 |
| Latin                          | Moldovan                                                                                                   | 2  |
| Hungarian                      | Hungarian                                                                                                  | 4  |
| Latin                          | Tuscan/Bergamo/Sardinian                                                                                   | 8  |
| South Slavic                   | Croat/Bulgarian                                                                                            | 6  |
| Greek                          | Cretan/Greek                                                                                               | 4  |
| Albanian                       | Albanian                                                                                                   | 4  |
| Indo-Aryan                     | Romani                                                                                                     | 3  |
| Germanic                       | English/Norwegian/Swedish/German/Orcadian/Icelandic                                                        | 12 |
| Latin                          | Spanish/French                                                                                             | 5  |
| -                              | Basque                                                                                                     | 2  |
| Georgian                       | Georgian                                                                                                   | 4  |
| Armenian                       | Armenian                                                                                                   | 8  |
| Abazgi                         | Abkhazian                                                                                                  | 5  |
| Southwestern                   | Azerbaijani/Turkish                                                                                        | 5  |
| Iranian                        | Iranian                                                                                                    | 6  |
| Circassian                     | Adygei/Circassian/Kabardin                                                                                 | 9  |
| Northwestern                   | Balkar/Kumyk                                                                                               | 6  |
| Avar-Andic/Lezgc/Nakh          | Avar/Chechen/Lezgin/Tabasaran                                                                              | 13 |
| Iranian                        | North Ossetian                                                                                             | 4  |
| Arabic                         | Arab/Bedouin/Druze/Jordanian/Palestinian/Saudi                                                             | 23 |
| Hebrew/Arabic                  | Samaritan/Iraqi Jew/Yemenite Jew                                                                           | 5  |



Sheet1

| Population<br>Derived Allele<br>Frequency | Sub-Region No.<br>Individuals | Sub-Region<br>Derived<br>Allele<br>Frequency | Region No.<br>Individuals | Region<br>Derived<br>Allele<br>Frequency |    |        |
|-------------------------------------------|-------------------------------|----------------------------------------------|---------------------------|------------------------------------------|----|--------|
| 66.67%                                    | 80                            | 39.38%                                       | 166                       | 33.13%                                   |    |        |
| 0.00%                                     |                               |                                              |                           |                                          |    |        |
| 53.13%                                    |                               |                                              |                           |                                          |    |        |
| -                                         |                               |                                              |                           |                                          |    |        |
| 27.27%                                    |                               |                                              |                           |                                          |    |        |
| 0.00%                                     |                               |                                              |                           |                                          |    |        |
| 25.00%                                    |                               |                                              |                           |                                          |    |        |
| 42.31%                                    |                               |                                              |                           |                                          |    |        |
| 12.50%                                    | 34                            | 33.82%                                       | 66                        | 31.06%                                   |    |        |
| 32.35%                                    |                               |                                              |                           |                                          |    |        |
| 35.29%                                    | 30                            | 26.67%                                       |                           |                                          |    |        |
| 16.67%                                    |                               |                                              |                           |                                          |    |        |
| 20.83%                                    |                               |                                              |                           |                                          |    |        |
| 33.33%                                    |                               |                                              |                           |                                          |    |        |
| 66.67%                                    | 22                            | 18.18%                                       |                           |                                          |    |        |
| 18.18%                                    |                               |                                              |                           |                                          |    |        |
| 6.25%                                     |                               |                                              |                           |                                          |    |        |
| 50.00%                                    | 28                            | 33.93%                                       | 38                        | 30.26%                                   |    |        |
| 0.00%                                     |                               |                                              |                           |                                          |    |        |
| 25.00%                                    |                               |                                              |                           |                                          |    |        |
| 75.00%                                    |                               |                                              |                           |                                          |    |        |
| 33.33%                                    |                               |                                              |                           |                                          |    |        |
| 50.00%                                    |                               |                                              |                           |                                          |    |        |
| 31.82%                                    | 38                            | 28.95%                                       | 38                        | 30.26%                                   |    |        |
| 35.71%                                    |                               |                                              |                           |                                          |    |        |
| 35.71%                                    |                               |                                              |                           |                                          |    |        |
| 16.67%                                    |                               |                                              |                           |                                          |    |        |
| 50.00%                                    | 17                            | 41.18%                                       |                           |                                          |    |        |
| -                                         |                               |                                              |                           |                                          |    |        |
| 37.50%                                    |                               |                                              |                           |                                          |    |        |
| 45.83%                                    |                               |                                              |                           |                                          |    |        |
| 0.00%                                     | 9                             | 27.78%                                       | 80                        | 17.50%                                   |    |        |
| 50.00%                                    |                               |                                              |                           |                                          |    |        |
| 25.00%                                    | 4                             | 25.00%                                       |                           |                                          |    |        |
| 50.00%                                    |                               |                                              |                           |                                          |    |        |
| 0.00%                                     | 8                             | 12.50%                                       |                           |                                          | 80 | 17.50% |
| 16.67%                                    |                               |                                              |                           |                                          |    |        |
| 0.00%                                     |                               |                                              |                           |                                          |    |        |
| 25.00%                                    | 2                             | 25.00%                                       | 80                        | 17.50%                                   |    |        |
| 13.04%                                    |                               |                                              |                           |                                          |    |        |
| 8.33%                                     |                               |                                              |                           |                                          |    |        |
| 23.08%                                    |                               |                                              |                           |                                          |    |        |
| 16.67%                                    | 24                            | 16.67%                                       | 64                        | 14.84%                                   |    |        |
| 18.18%                                    |                               |                                              |                           |                                          |    |        |
| 0.00%                                     | 2                             | 0.00%                                        |                           |                                          |    |        |
| 0.00%                                     |                               |                                              |                           |                                          |    |        |
| 50.00%                                    | 4                             | 37.50%                                       | 64                        | 14.84%                                   |    |        |
| 25.00%                                    |                               |                                              |                           |                                          |    |        |

Sheet1

|        |    |        |     |        |
|--------|----|--------|-----|--------|
| 12.50% | 20 | 17.50% |     |        |
| 25.00% |    |        |     |        |
| 0.00%  |    |        |     |        |
| 50.00% |    |        |     |        |
| 0.00%  |    |        |     |        |
|        |    |        |     |        |
| 8.82%  | 40 | 11.25% |     |        |
|        |    |        |     |        |
| 12.50% |    |        |     |        |
| 16.67% |    |        |     |        |
| 22.20% | 9  | 22.20% | 51  | 14.70% |
| 0.00%  | 13 | 19.23% |     |        |
| 25.00% |    |        |     |        |
| 12.50% |    |        |     |        |
| 12.50% | 4  | 12.50% |     |        |
|        |    |        |     |        |
| 8.30%  | 14 | 10.71% |     |        |
| 16.70% |    |        |     |        |
| 0.00%  |    |        |     |        |
|        |    |        |     |        |
| 12.50% | 11 | 9.09%  |     |        |
| 7.10%  |    |        |     |        |
| 16.67% | 28 | 25.00% | 143 | 14.34% |
| 12.50% |    |        |     |        |
| 33.33% |    |        |     |        |
| 33.33% |    |        |     |        |
| 16.67% |    |        |     |        |
|        |    |        |     |        |
| 16.67% | 35 | 15.71% |     |        |
| 10.00% |    |        |     |        |
| 16.67% |    |        |     |        |
|        |    |        |     |        |
| 33.33% | 36 | 12.50% |     |        |
| 8.33%  |    |        |     |        |
| 25.00% |    |        |     |        |
| 0.00%  |    |        |     |        |
| 6.25%  | 25 | 10.00% |     |        |
| 8.33%  |    |        |     |        |
| 12.50% |    |        |     |        |
| 12.50% |    |        |     |        |
| 16.67% |    |        |     |        |
|        |    |        |     |        |
| 4.17%  | 19 | 5.26%  |     |        |
| 0.00%  |    |        |     |        |
| 25.00% |    |        |     |        |
|        |    |        |     |        |
| 25.00% | 22 | 20.00% | 91  | 10.99% |
| 25.00% |    |        |     |        |
| 20.00% |    |        |     |        |
| 10.00% |    |        |     |        |
| 16.67% | 6  | 16.67% |     |        |
|        |    |        |     |        |
| 16.67% | 32 | 10.94% |     |        |
| 8.33%  |    |        |     |        |
| 11.54% |    |        |     |        |
| 0.00%  |    |        |     |        |
| 2.17%  | 31 | 3.23%  |     |        |
| 0.00%  |    |        |     |        |



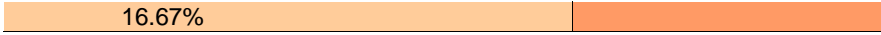

Supplement: 41380_2018_149_MOESM22_ESM.pdf [file 41380_2018_149_MOESM22_ESM.pdf]
